# Supplementary material for: Chlorine Isotope Effects from Isotope Ratio Mass Spectrometry Suggest Intramolecular C-Cl Bond Competition in Trichloroethene (TCE) Reductive Dehalogenation
Source: MDPI journal article supplement (doi:10.3390/molecules19056450), 2014-05-20
Supplement: s1 [file s1]

# Supporting Information for

## Chlorine Isotope Effects from Isotope Ratio Mass Spectrometry Suggest Intramolecular C-Cl Bond Competition in Trichloroethene (TCE) Reductive Dehalogenation

Stefan Cretnik <sup>1</sup>, Anat Bernstein <sup>1</sup>, Orfan Shouakar-Stash <sup>2</sup>, Frank Löffler <sup>3,4,5</sup> and Martin Elsner <sup>1,\*</sup>

<sup>1</sup> Institute of Groundwater Ecology, Helmholtz Zentrum München, Ingolstädter Landstr. 1, 85764 Neuherberg, Germany; E-Mails: one\_fiftyone@hotmail.com (S.C.); anatbern@bgu.ac.il (A.B.)

<sup>2</sup> Department of Earth and Environmental Sciences, University of Waterloo, Waterloo, ON N2L 3G1, Canada; E-Mail: orfan@uwaterloo.ca

<sup>3</sup> Department of Microbiology & Center for Environmental Biotechnology, University of Tennessee, Knoxville, TN 37996-2000, USA; E-Mail: frank.loeffler@utk.edu

<sup>4</sup> Department of Civil and Environmental Engineering, University of Tennessee, Knoxville, TN 37996-2000, USA

<sup>5</sup> Oak Ridge National Laboratory (UT-ORNL) Joint Institute for Biological Sciences (JIBS) and Bioscience Division, Oak Ridge National Laboratory, Oak Ridge, TN 37831, USA

\* Author to whom correspondence should be addressed; E-Mail: martin.elsner@helmholtz-muenchen.de; Tel.: +49-89-3187-2565; Fax: +49-89-3187-3361.

### Contents

|                                                                                                                            |            |
|----------------------------------------------------------------------------------------------------------------------------|------------|
| <b>A1. Materials and Methods .....</b>                                                                                     | <b>S2</b>  |
| <i>A1.1. Biodegradation of PCE with Desulfotobacterium Strain Viet-1 .....</i>                                             | <i>S2</i>  |
| <i>A1.2. Biodegradation of TCE with Geobacter Lovleyi Strain SZ.....</i>                                                   | <i>S2</i>  |
| <i>A1.3. Concentration Measurements .....</i>                                                                              | <i>S3</i>  |
| <i>A1.4. Stable Carbon Isotope Analysis .....</i>                                                                          | <i>S3</i>  |
| <i>A1.5. Stable Chlorine Isotope Analysis .....</i>                                                                        | <i>S3</i>  |
| <b>A2. Equations.....</b>                                                                                                  | <b>S4</b>  |
| <i>A2.1. Dechlorination Reactions with PCE. ....</i>                                                                       | <i>S4</i>  |
| <i>A2.2. Dechlorination Reactions with TCE .....</i>                                                                       | <i>S5</i>  |
| <b>A3. Different Contributions of Primary and Secondary Isotope Effects .....</b>                                          | <b>S7</b>  |
| <b>A4. Concentration Profiles of Biodegradation Experiments.....</b>                                                       | <b>S8</b>  |
| <b>A5. Original Experimental Data Including <math>\delta^{37}\text{Cl}_{\text{Cl-}}</math> and Propagated Errors .....</b> | <b>S8</b>  |
| <b>A6. Equations to Calculate <math>\delta^{37}\text{Cl}_{\text{Cl-}}</math> and Propagated Errors.....</b>                | <b>S8</b>  |
| <i>A6.1. TCE Experiment. ....</i>                                                                                          | <i>S8</i>  |
| <i>A6.2. PCE Experiment.....</i>                                                                                           | <i>S9</i>  |
| <b>A7. Fitting Procedures and Regression Reports.....</b>                                                                  | <b>S9</b>  |
| <i>A7.1. Regressions of Figure 2.....</i>                                                                                  | <i>S9</i>  |
| <i>A7.2. Regressions of Figure 3.....</i>                                                                                  | <i>S17</i> |
| <i>A7.3. Regressions of Figure 6.....</i>                                                                                  | <i>S22</i> |
| <b>Total Number of Pages: 27 + one additional Excel Document (A5)</b>                                                      |            |

## A1. Materials and Methods

### A1.1. Biodegradation of PCE with *Desulfitobacterium* Strain Viet-1

Biodegradation experiments of PCE were carried out using the microbial strain *Desulfitobacterium* strain VIET-1, which reductively dechlorinates PCE to the final product TCE. It was gratefully provided by Frank Loeffler and his collection of Microorganisms at University of Tennessee and it was cultured according to DSMZ instructions, medium 720, with PCE as the electron acceptor. The growth medium for the experiment was prepared in glass bottles (250 mL), equipped with Mininert valves (Supelco, Bellefonte, PA, USA), and filled with 150 mL of medium, leaving a headspace of 40%. The bottles were amended with 10  $\mu$ L of neat PCE and constantly shaken on a horizontal shaker at 120 rpm for four days. Inoculation was carried out by adding 20 mL of active culture, which was previously grown in a similar medium. To eliminate carry-over of the degradation product (TCE) to the fresh medium, the media with the culture that was used for inoculation was flushed with N<sub>2</sub>/CO<sub>2</sub> gas stream (80%/20%) for 5 h prior transferring to the fresh medium. A complete removal of chloroethenes after degassing was controlled by GC-FID measurements. This procedure was followed for three biological replicates. Abiotic control batches were prepared similarly, but without inoculation of the active culture. Sampling was carried out 20 min after inoculation for the initial sample, and at given time points along the degradation. A total sample volume of 7 mL was taken with a glass syringe (Hamilton, ON, Canada), which was distributed in portions of 1 mL each into 7 amber vials with an active volume of 1.6 mL. In order to stop biological activity, the vials were spiked with 50  $\mu$ L of NaOH (1 M) and closed with PTFE-lined screw caps. All vials were frozen upside down for subsequent isotope analysis, except one vial, which was used immediately for concentration analysis.

### A1.2. Biodegradation of TCE with *Geobacter Lovleyi* Strain SZ

Biodegradation experiments of TCE were carried out using the microbial strain *Geobacter lovleyi* strain SZ, purchased from the German Collection of Microorganisms and Cell Cultures (DSMZ, Braunschweig, Germany). This strain reductively dechlorinates TCE to the final product *cis*-DCE. A growth medium was prepared according to DSMZ instructions, medium 732, with the exception that neither hexadecane nor perchloroethylene was added to the medium. The growth medium for the experiment was prepared in glass bottles (250 mL), equipped with Mininert valves (Supelco, Bellefonte, PA, USA), and filled with 150 mL of medium, leaving a headspace of 40%. The bottles were amended with 10  $\mu$ L of neat TCE and constantly shaken on a horizontal shaker at 120 rpm for four days. Inoculation was carried out by adding 14 mL of active culture, which was previously grown in a similar medium. To eliminate carry-over of the degradation product (*cis*-DCE) to the fresh medium, the media with the culture that was used for inoculation was flushed with N<sub>2</sub>/CO<sub>2</sub> gas stream (80%/20%) for 5 h prior transferring to the fresh medium. A complete removal of chloroethenes after degassing was controlled by GC-FID measurements. This procedure was followed for three biological replicates. Abiotic control batches were prepared similarly, but without inoculation of the active culture. Sampling was carried out 20 min after inoculation for the initial sample, and at given time points along the degradation. A total sample volume of 7 mL was taken with a glass syringe (Hamilton, ON, Canada), which was distributed in portions of 1 mL each into 7 amber vials with an

active volume of 1.6 mL. In order to stop biological activity, the vials were spiked with 50  $\mu\text{L}$  of NaOH (1 M) and closed with PTFE-lined screw caps. All vials were frozen upside down for subsequent isotope analysis, except one vial, which was used immediately for concentration analysis.

#### A1.3. Concentration Measurements

PCE, TCE and *cis*-DCE concentrations in the biodegradation experiments were measured by a gas chromatograph equipped with flame ionization detector (GC-FID, Hewlett Packard 5890 Series II) equipped with a 30 m VOCOL column (Supelco, Bellefonte, PA, USA) 0.25 mm inner diameter, with a film thickness of 1.5  $\mu\text{m}$  and operated with nitrogen as carrier gas at 1.6 mL/min. Automated headspace injections of 1 mL from 10 mL headspace vials were carried out using a Pal<sup>TM</sup> autosampler (CTC Analytics), and an injector temperature on the GC of 200  $^{\circ}\text{C}$ . Calibrations were performed along each measurement using solutions of the chloroethenes with concentrations between 4.0 and 383.9 mg/L. The resulting total relative error in concentrations was estimated as  $\pm 10\%$ .

#### A1.4. Stable Carbon Isotope Analysis

Compound Specific Isotope Analysis (CSIA) for carbon was conducted by injection of headspace samples on a GC-IRMS system (Thermo Fisher Scientific, Waltham, MA, USA) consisting of a Trace GC with a Pal<sup>TM</sup> autosampler (CTC Analytics), coupled to a MAT 253 IRMS through a GC/C III combustion interface. The gas chromatograph was equipped with a 30 m VOCOL column (Supelco, Bellefonte, PA, USA), 0.25 mm inner diameter, with a film thickness of 1.5  $\mu\text{m}$  and operated with He carrier gas at 1.4 mL/min. The GC program started at 85  $^{\circ}\text{C}$  (8 min) and increased at 60  $^{\circ}\text{C}/\text{min}$  to 205  $^{\circ}\text{C}$  (1 min). Internal standards of PCE, TCE and *cis*-DCE were used along the measurements. The analytical uncertainty  $2\sigma$  of carbon isotope analysis was  $\pm 0.5\text{‰}$ .

#### A1.5. Stable Chlorine Isotope Analysis

Chlorine isotope analysis of PCE TCE, and *cis*-DCE was performed according to a method adapted from Shouakar-Stash *et al.* (2006). PCE TCE, and *cis*-DCE are transferred from a Trace-GC (Thermo Scientific, Waltham, MA, USA) to the MAT 253 IRMS through the He carrier stream, where the chloroethenes are ionized and fragmented for isotope ratio measurements. The measurements were conducted at masses  $m/z = 94, 96$  for PCE,  $m/z = 95, 97$  for TCE,  $m/z = 96, 98$  for *cis*-DCE. The gas chromatograph was equipped with a 30 m VOCOL column (Supelco, Bellefonte, PA, USA) with 0.25 mm inner diameter, a film thickness of 1.5  $\mu\text{m}$  and operated with a He carrier gas at 1.4 mL/min. The GC program used started at 50  $^{\circ}\text{C}$  (7 min), increasing at 60  $^{\circ}\text{C}/\text{min}$  to 70  $^{\circ}\text{C}$  (2.70 min) and at 80  $^{\circ}\text{C}/\text{min}$  to 140  $^{\circ}\text{C}$  (0.10 min). External standards were measured daily for calibration of  $\delta^{37}\text{Cl}$  values according to Bernstein *et al.* Briefly, a reference gas of each target analyte is introduced via a dual inlet system. In order to enable isotope measurements of two chlorinated ethenes in one run, the chlorinated ethene with the shorter retention time was introduced at the beginning of each run from one bellow of the dual inlet, while at the end of each run the chlorinated ethene with the longer retention time was introduced from the other bellow. The conversion to delta values relative to the international reference Standard Mean Ocean Chloride (SMOC) was performed by an external two-point calibration analysing

chloroethene-standards as previously characterized in the Department of Earth Sciences, University of Waterloo. Each of these standards was added in triplicates before, during and at the end of each sequence, in order to calibrate the obtained values of the samples with respect to SMOC. The analytical uncertainty  $2\sigma$  of chlorine isotopic measurements was  $\pm 0.2\%$ .

## A2. Equations

The following considerations are based on the one hand on Rayleigh equation, as it is well established to express enrichment factors  $\varepsilon$  for a certain element E in a substrate along a certain progress of reaction  $f$  according to Equation (9) in the manuscript with

$$\delta^h E = \delta^h E_0 + \varepsilon \cdot \ln f \quad (\text{S1})$$

On the other hand, an isotopic mass balance can be performed for any reaction in a closed system. Here, the reactant contains  $m_S$  atoms of element  $E$  in its structure.  $\delta^h E_0$  is the original reactant isotope ratio, whereas  $\delta^h E$  is the ratio when reaction has occurred so that only a fraction  $f$  of reactant remains. A fraction of  $(1 - f)$  has then been converted to one or more (up to  $n$ ) products;  $m_i$  is the number of atoms of  $E$  inside the structure of product  $i$ ,  $\delta^h E_{P,i}$  is the respective product's isotope value. In the Manuscript, the respective relationship is given with Equation (11) with

$$\sum_{i=1}^n m_i \cdot \delta^h E_{P,i} = \frac{m_S \cdot \delta^h E_0 - m_S \cdot f \cdot \delta^h E}{(1 - f)} \quad (\text{S2})$$

### A2.1. Dechlorination Reactions with PCE

In the case of PCE, molecular positions are chemically equivalent so that the same chlorine atoms may potentially end up in TCE or  $\text{Cl}^-$ . Isotopes then partition according to the kinetic isotope effects associated with the formation of either product,  $\alpha_i = 1/\text{KIE}_i$ . As a consequence, in both cases their isotope ratios relate according to

$$\frac{R_{P_1}}{R_{P_2}} = \frac{\alpha_1}{\alpha_2} \quad (\text{S3})$$

This can be expressed in the delta notation:

$$\frac{\delta^{37}\text{Cl}_{P_1} + 1}{\delta^{37}\text{Cl}_{P_2} + 1} = \frac{\alpha_1}{\alpha_2} = \alpha_{\text{Diff}} \quad (\text{S4})$$

with  $\alpha_{\text{Diff}}$  expressing the ratio between the primary isotope effect (in the formation of  $\text{Cl}^-$ ) and the average secondary isotope effects (in the three molecular positions which become TCE). This equation can be rearranged and simplified according to

$$\delta^{37}\text{Cl}_{P_1} + 1 = \alpha_{\text{Diff}} (\delta^{37}\text{Cl}_{P_2} + 1) \rightarrow \delta^{37}\text{Cl}_{P_1} - \underset{\approx 1}{\alpha_{\text{Diff}}} \cdot \delta^{37}\text{Cl}_{P_2} = \alpha_{\text{Diff}} - 1 \quad (\text{S5})$$

$$\rightarrow \delta^{37}\text{Cl}_{P_1} - \delta^{37}\text{Cl}_{P_2} = \alpha_{\text{Diff}} - 1 = \varepsilon_{\text{Diff}} \quad (\text{S6})$$

This means the difference between primary and secondary isotope effects  $\varepsilon_{Diff}$  is directly obtained from product isotope values, because chlorine isotope ratios of  $Cl^-$  and TCE are always by  $\varepsilon_{Diff}$  apart.

This can be combined with the isotopic mass balance for the case of PCE degradation to TCE according to

$$\delta^{37}Cl_{0,PCE} = f \cdot \delta^{37}Cl_{PCE} + \frac{1}{4}(1-f)\delta^{37}Cl_{Cl^-} + \frac{3}{4}(1-f) \cdot \delta^{37}Cl_{TCE} \quad (S7)$$

Equation (17) in the manuscript is here expressed in Equation (S8) with

$$\begin{aligned} \delta^{37}Cl_{TCE} - \delta^{37}Cl_{Cl^-} &= \varepsilon_{Diff} \\ \rightarrow \delta^{37}Cl_{TCE} &= \varepsilon_{Diff} + \delta^{37}Cl_{Cl^-} \text{ and } \delta^{37}Cl_{Cl^-} = \delta^{37}Cl_{TCE} - \varepsilon_{Diff} \end{aligned} \quad (S8)$$

When Equations (S7) and (S8) is combined, we can resolve the isotope signatures individually for chloride according to

$$\delta^{37}Cl_{0,PCE} = f \cdot \delta^{37}Cl_{PCE} + \frac{1}{4}(1-f)\delta^{37}Cl_{Cl^-} + \frac{3}{4}(1-f) \cdot \varepsilon_{Diff} + \frac{3}{4}(1-f) \cdot \delta^{37}Cl_{Cl^-}$$

Together with the Rayleigh enrichment trend for PCE, the isotope trends of the formed chloride can be expressed with

$$\delta^{37}Cl_{Cl^-} = \underbrace{\delta^{37}Cl_{0,PCE} - \frac{3}{4}\varepsilon_{Diff}}_{\text{constant: } K_{Cl^-}} - \varepsilon_{chlorine} \cdot \frac{f \cdot \ln f}{(1-f)} \quad (S9)$$

A similar procedure can be followed in order to resolve Equations (S7) and (S8) towards TCE, and we obtain an expression to model the enrichment trend of TCE with

$$\delta^{37}Cl_{TCE} = \underbrace{\delta^{37}Cl_{0,PCE} + \frac{1}{4}\varepsilon_{Diff}}_{\text{constant: } K_{TCE}} - \varepsilon_{chlorine} \cdot \frac{f \cdot \ln f}{(1-f)} \quad (S10)$$

The equations to Equations (S9) and (S10) are equal to Equations (18) and (19) from the manuscript, which were used for mathematical modeling of product isotope enrichment of PCE.

## A2.2. Dechlorination Reactions with TCE

In the case of TCE, molecular positions are chemically distinguishable, and a structural preference is present in the  $\alpha$ -position according to the selective formation of *cis*-DCE so that the same chlorine atoms may potentially end up in TCE or  $Cl^-$ . It is, then, of interest to which percentage of  $Cl_{\alpha,E}$  and  $Cl_{\alpha,Z}$  react to form the cleaved chloride. A factor  $x$  can be introduced to express this as

$$x = \text{percentage that reacts from } Cl_{\alpha,E} \text{ to } Cl^-_{\alpha,2}$$

$$(1-x) = \text{percentage that reacts from } Cl_{\alpha,Z} \text{ to } Cl^-_{\alpha,2}$$

with an  $x = 1$  the reaction would follow a position-specific cleavage, while any  $1 > x > 0$  would reflect a case where two positions are involved. For each of the three chlorinated positions the mass balance can be raised individually in an extension of the equations describing the isotopic mass balance

$$\delta^{37}Cl_{0,\alpha,E} = f \cdot \delta^{37}Cl_{\alpha,E} + x \cdot (1-f) \cdot \delta^{37}Cl_{Cl_{\alpha,2}}^{from\alpha,E} + (1-x)(1-f) \cdot \delta^{37}Cl_{cDCE,\alpha,1}^{from\alpha,E} \quad (S11)$$

$$\delta^{37}Cl_{0,\alpha,Z} = f \cdot \delta^{37}Cl_{\alpha,Z} + (1-x) \cdot (1-f) \cdot \delta^{37}Cl_{Cl_{\alpha,2}}^{from\alpha,Z} + x \cdot (1-f) \cdot \delta^{37}Cl_{cDCE,\alpha,1}^{from\alpha,Z} \quad (S12)$$

$$\delta^{37}Cl_{0,\beta} = f \cdot \delta^{37}Cl_{\beta} + (1-f) \cdot \delta^{37}Cl_{cDCE,\beta} \quad (S13)$$

For the two individual reacting positions, the difference in their isotope signatures reflect the difference of position specific enrichment factors for the case of a primary isotope effect with the formation of chloride, or a secondary isotope effect with the formation of *cis*-DCE. This difference of enrichment factors have to be treated separately for  $Cl_{\alpha,E}$  and  $Cl_{\alpha,Z}$ , according to

$$\delta^{37}Cl_{Cl_{\alpha,2}}^{from\alpha,E} - \delta^{37}Cl_{cDCE,\alpha,1}^{from\alpha,E} = \varepsilon_{Diff,\alpha,E} \quad (S14)$$

$$\delta^{37}Cl_{Cl_{\alpha,2}}^{from\alpha,Z} - \delta^{37}Cl_{cDCE,\alpha,1}^{from\alpha,Z} = \varepsilon_{Diff,\alpha,Z} \quad (S15)$$

These differences in fractionation factors can be included in the position specific mass balance to give

$$\delta^{37}Cl_{Cl_{\alpha,2}}^{from\alpha,E} = \delta^{37}Cl_{0,\alpha,E} + (1-x) \cdot \varepsilon_{Diff,\alpha,E} - \varepsilon_{\alpha,E} \frac{f \ln f}{(1-f)} \quad (S16)$$

$$\delta^{37}Cl_{Cl_{\alpha,2}}^{from\alpha,Z} = \delta^{37}Cl_{0,\alpha,Z} + x \cdot \varepsilon_{Diff,\alpha,Z} - \varepsilon_{\alpha,Z} \frac{f \ln f}{(1-f)} \quad (S17)$$

$$\delta^{37}Cl_{cDCE,\alpha,1}^{from\alpha,E} = \delta^{37}Cl_{0,\alpha,E} - x \cdot \varepsilon_{Diff,\alpha,E} - \varepsilon_{\alpha,E} \frac{f \ln f}{(1-f)} \quad (S18)$$

$$\delta^{37}Cl_{cDCE,\alpha,1}^{from\alpha,Z} = \delta^{37}Cl_{0,\alpha,Z} - (1-x) \cdot \varepsilon_{Diff,\alpha,Z} - \varepsilon_{\alpha,Z} \frac{f \ln f}{(1-f)} \quad (S19)$$

$$\delta^{37}Cl_{cDCE,\beta} = \delta^{37}Cl_{0,\beta} - \varepsilon_{\beta} \frac{f \ln f}{(1-f)} \quad (S20)$$

The isotopic mass balance can now be set up for the cleaved chloride according to

$$\begin{aligned} \delta^{37}Cl_{Cl_{\alpha,2}} &= \left( x \cdot \delta^{37}Cl_{Cl_{\alpha,2}}^{from\alpha,E} + (1-x) \cdot \delta^{37}Cl_{Cl_{\alpha,2}}^{from\alpha,Z} \right) \\ &= \left( x \cdot \delta^{37}Cl_{0,\alpha,E} + x(1-x) \cdot \varepsilon_{Diff,\alpha,E} - x\varepsilon_{\alpha,E} \frac{f \ln f}{(1-f)} + (1-x)\delta^{37}Cl_{0,\alpha,Z} + (1-x) \cdot x \cdot \varepsilon_{Diff,\alpha,Z} - (1-x) \cdot \varepsilon_{\alpha,Z} \frac{f \ln f}{(1-f)} \right) \quad (S21) \\ &= \underbrace{\left( x \cdot \delta^{37}Cl_{0,\alpha,E} + (1-x)\delta^{37}Cl_{0,\alpha,Z} + x(1-x) \cdot [\varepsilon_{Diff,\alpha,E} + \varepsilon_{Diff,\alpha,Z}] \right)}_{\text{constant: } K_{Cl^-}} - \underbrace{\left[ x \cdot (\varepsilon_{\alpha,E} - \varepsilon_{\alpha,Z}) + \varepsilon_{\alpha,Z} \right]}_{\varepsilon_{TCE \rightarrow \text{chloride}}} \frac{f \ln f}{(1-f)} \end{aligned}$$

The enrichment factor can be extracted here in order to reflect Equation (22) from the manuscript

$$\varepsilon_{TCE \rightarrow \text{chloride}} = \left( x \cdot \varepsilon_{\alpha,E} + (1-x) \cdot \varepsilon_{\alpha,Z} \right) \quad (S22)$$

In the interpretation of our experiments, isotope data of chloride was therefore modeled with

$$\delta^{37}Cl_{Cl^-} = K_{Cl^-} - \varepsilon_{TCE \rightarrow \text{chloride}} \frac{f \ln f}{(1-f)} \quad (S23)$$

Also in the case of *cis*-DCE, an isotopic mass balance could be set up according to

$$\begin{aligned}
\delta^{37}Cl_{cDCE} &= \frac{1}{2}\delta^{37}Cl_{\beta} + \frac{1}{2}\left[(1-x) \cdot \delta^{37}Cl_{cDCE,\alpha,1}^{from\alpha,E} + x \cdot \delta^{37}Cl_{cDCE,\alpha,1}^{from\alpha,Z}\right] \\
&= \frac{1}{2}\left(\delta^{37}Cl_{0,\beta} - \varepsilon_{\beta} \frac{f \ln f}{(1-f)}\right) \\
&+ \frac{1}{2}\left[(1-x)\left(\delta^{37}Cl_{0,\alpha,E} - x \cdot \varepsilon_{Diff,\alpha,E} - \varepsilon_{\alpha,E} \frac{f \ln f}{(1-f)}\right) + x\left(\delta^{37}Cl_{0,\alpha,Z} - (1-x) \cdot \varepsilon_{Diff,\alpha,Z} - \varepsilon_{\alpha,Z} \frac{f \ln f}{(1-f)}\right)\right] \quad (S24) \\
&= \underbrace{\frac{1}{2}\left(\delta^{37}Cl_{0,\beta} + \frac{(1-x) \cdot \delta^{37}Cl_{0,\alpha,E} + x \cdot \delta^{37}Cl_{0,\alpha,Z}}{2}\right)}_{\text{constant: } K_{cDCE}} + \underbrace{\frac{1}{2}x \cdot (1-x) \left[\varepsilon_{Diff,\alpha,E} - \varepsilon_{Diff,\alpha,Z}\right] - \frac{1}{2}\left[\varepsilon_{\beta} + x(\varepsilon_{\alpha,Z} - \varepsilon_{\alpha,E}) + \varepsilon_{\alpha,E}\right] \frac{f \ln f}{(1-f)}}_{\varepsilon_{TCE \rightarrow cis-DCE}}
\end{aligned}$$

The enrichment factor can be extracted here in order to reflect Equation (23) from the manuscript

$$\varepsilon_{TCE \rightarrow cis-DCE} = \frac{1}{2}\left[\varepsilon_{\beta} + \left(x \cdot (\varepsilon_{\alpha,Z} - \varepsilon_{\alpha,E}) + \varepsilon_{\alpha,E}\right)\right] = \frac{1}{2}\left[\varepsilon_{\beta} + \left(x \cdot \varepsilon_{\alpha,Z} + (1-x) \varepsilon_{\alpha,E}\right)\right] \quad (S25)$$

Modeling of the obtained isotope data of cis-DCE from our experiments is therefore possible with

$$\delta^{37}Cl_{cDCE} = K_{cDCE} - \varepsilon_{TCE \rightarrow cis-DCE} \frac{f \ln f}{(1-f)} \quad (S26)$$

### A3. Different Contributions of Primary and Secondary Isotope Effects

A different numerical scenario is visualized here, in order to show how different contributions in the  $\alpha$ -positions depend on  $x$ , by accounting for different primary and secondary chlorine isotope effects for the individual positions. The exemplary numeric values here were  $\varepsilon_{\alpha,E,primary} = -10\%$ ;  $\varepsilon_{\alpha,E,secondary} = -3\%$ ;  $\varepsilon_{\alpha,Z,primary} = -8\%$ ;  $\varepsilon_{\alpha,Z,secondary} = -1\%$ . The representation shows a similar qualitative trend, where (i)  $\varepsilon_{\alpha}$  is stronger in the position from which more chloride is formed; and (ii) in addition, more atoms of this position are passed on to chloride so that product curve of chloride more strongly reflects this higher enrichment trend. The opposite trend can be observed in the product curve of cis-DCE.

**Figure S1.** Visualisation of Figure 1 with different contributions of primary and secondary isotope effects.

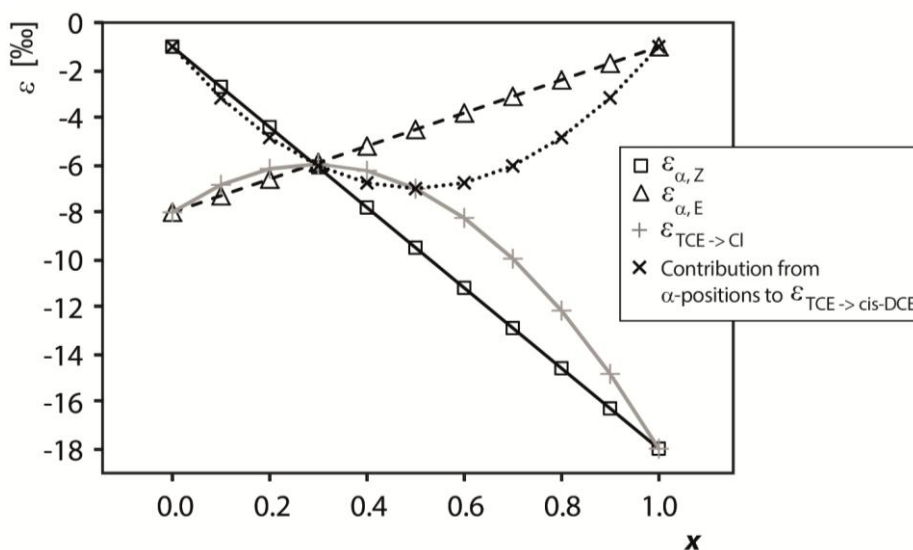

## A4. Concentration Profiles of Biodegradation Experiments

**Figure S2.** PCE degradation by *Desulfitobacterium* strain Viet1.

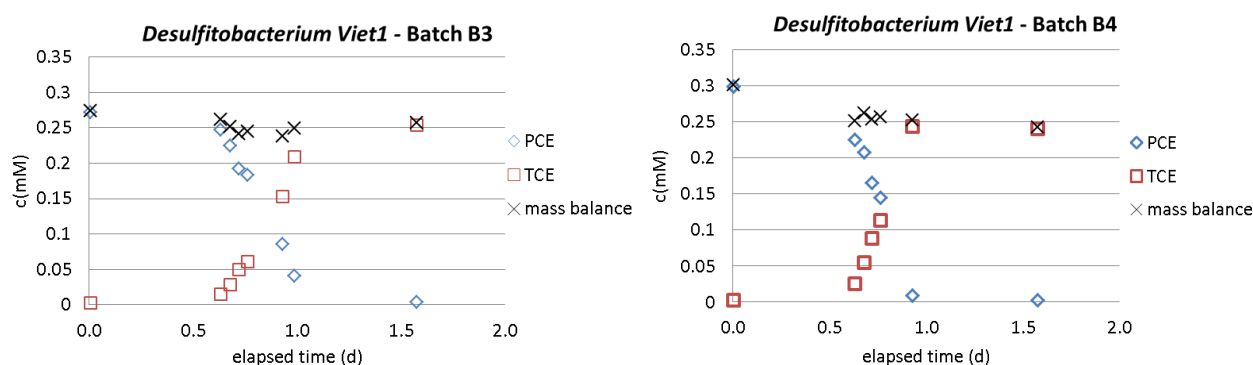

**Figure S3.** TCE degradation by *Geobacter lovleyi* strain SZ.

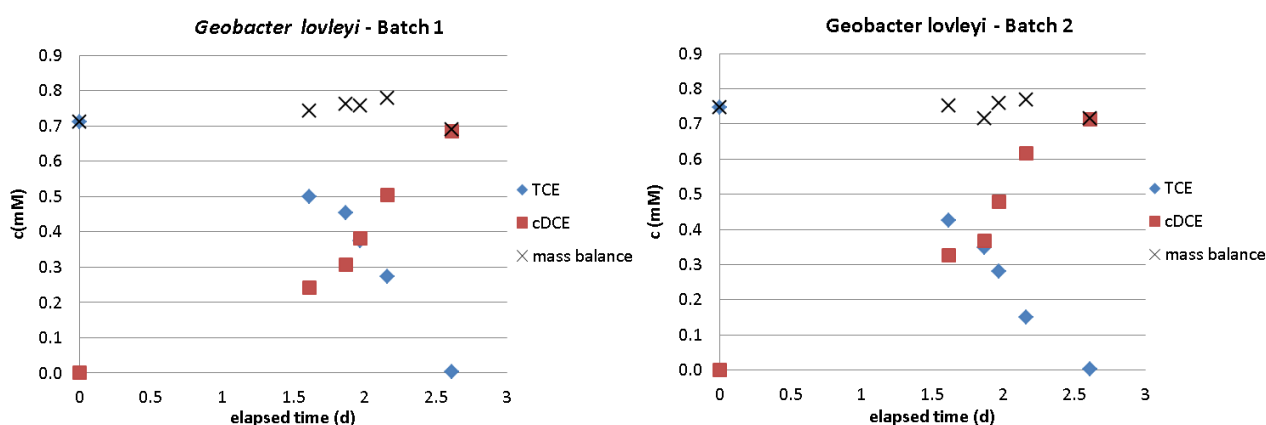

## A5. Original Experimental Data Including $\delta^{37}\text{Cl}_{\text{Cl}^-}$ and Propagated Errors

See attached Excel Document.

## A6. Equations to Calculate $\delta^{37}\text{Cl}_{\text{Cl}^-}$ and Propagated Errors

### A6.1. TCE Experiment

$$\delta^{37}\text{Cl}_{\text{Cl}^-} = \left[ 3 \cdot \delta^{37}\text{Cl}_{0,\text{TCE}} - 3 \cdot \delta^{37}\text{Cl}_{\text{TCE}} \cdot f - 2 \cdot \delta^{37}\text{Cl}_{\text{cis-DCE}} \cdot (1-f) \right] / (1-f)$$

Error in the parameter as a result of error propagation:

$$\Delta(\delta^{37}\text{Cl}_{\text{Cl}^-}) = \sqrt{\left[ \frac{\partial(\delta^{37}\text{Cl}_{\text{Cl}^-})}{\partial(\delta^{37}\text{Cl}_{0,\text{TCE}})} \right]^2 \cdot [\Delta(\delta^{37}\text{Cl}_{0,\text{TCE}})]^2 + \left[ \frac{\partial(\delta^{37}\text{Cl}_{\text{Cl}^-})}{\partial(\delta^{37}\text{Cl}_{\text{TCE}})} \right]^2 \cdot [\Delta(\delta^{37}\text{Cl}_{\text{TCE}})]^2 + \left[ \frac{\partial(\delta^{37}\text{Cl}_{\text{Cl}^-})}{\partial(\delta^{37}\text{Cl}_{\text{cis-DCE}})} \right]^2 \cdot [\Delta(\delta^{37}\text{Cl}_{\text{cis-DCE}})]^2 + \left[ \frac{\partial(\delta^{37}\text{Cl}_{\text{Cl}^-})}{\partial f} \right]^2 \cdot [\Delta f]^2}$$



$$\begin{aligned}
\partial(\delta^{37}Cl_{Cl^-})/\partial(\delta^{37}Cl_{0,TCE}) &= 3/(1-f) \\
\partial(\delta^{37}Cl_{Cl^-})/\partial(\delta^{37}Cl_{TCE}) &= -3 \cdot f/(1-f) \\
\partial(\delta^{37}Cl_{Cl^-})/\partial(\delta^{37}Cl_{cis-DCE}) &= -2 \\
\partial(\delta^{37}Cl_{Cl^-})/\partial f &= [-3 \cdot \delta^{37}Cl_{TCE} + 2 \cdot \delta^{37}Cl_{cis-DCE}]/(1-f) \\
&+ [3 \cdot \delta^{37}Cl_{0,TCE} - 3 \cdot \delta^{37}Cl_{TCE} \cdot f - 2 \cdot \delta^{37}Cl_{cis-DCE} \cdot (1-f)]/(1-f)^2
\end{aligned}$$

#### A6.2. PCE Experiment

$$\delta^{37}Cl_{Cl^-} = [4 \cdot \delta^{37}Cl_{0,PCE} - 4 \cdot \delta^{37}Cl_{PCE} \cdot f - 3 \cdot \delta^{37}Cl_{TCE} \cdot (1-f)]/(1-f)$$

Error in the parameter as a result of error propagation:

$$\begin{aligned}
\Delta(\delta^{37}Cl_{Cl^-}) &= \sqrt{\left[ \frac{\partial(\delta^{37}Cl_{Cl^-})}{\partial(\delta^{37}Cl_{0,PCE})} \right]^2 \cdot [\Delta(\delta^{37}Cl_{0,PCE})]^2 + \left[ \frac{\partial(\delta^{37}Cl_{Cl^-})}{\partial(\delta^{37}Cl_{PCE})} \right]^2 \cdot [\Delta(\delta^{37}Cl_{PCE})]^2 + \left[ \frac{\partial(\delta^{37}Cl_{Cl^-})}{\partial(\delta^{37}Cl_{TCE})} \right]^2 \cdot [\Delta(\delta^{37}Cl_{TCE})]^2 + \left[ \frac{\partial(\delta^{37}Cl_{Cl^-})}{\partial f} \right]^2 \cdot [\Delta f]^2} \\
\partial(\delta^{37}Cl_{Cl^-})/\partial(\delta^{37}Cl_{0,PCE}) &= 4/(1-f) \\
\partial(\delta^{37}Cl_{Cl^-})/\partial(\delta^{37}Cl_{PCE}) &= -4 \cdot f/(1-f) \\
\partial(\delta^{37}Cl_{Cl^-})/\partial(\delta^{37}Cl_{TCE}) &= -3 \\
\partial(\delta^{37}Cl_{Cl^-})/\partial f &= [-4 \cdot \delta^{37}Cl_{PCE} + 3 \cdot \delta^{37}Cl_{TCE}]/(1-f) \\
&+ [4 \cdot \delta^{37}Cl_{0,PCE} - 4 \cdot \delta^{37}Cl_{PCE} \cdot f - 3 \cdot \delta^{37}Cl_{TCE} \cdot (1-f)]/(1-f)^2
\end{aligned}$$

#### A7. Fitting Procedures and Regression Reports

Fits were conducted with non-linear Regressions in Sigma Plot 12.0 for Windows. Reports of all regressions are given below.

##### A7.1. Regressions of Figure 2

Fit of d13C Data of PCE in PCE Experiment

$$f = a + ((k) \times \ln(x))$$

| R     | Rsqr  | Adj Rsqr | Standard Error of Estimate |
|-------|-------|----------|----------------------------|
| 0.997 | 0.993 | 0.993    | 1.158                      |

|   | <b>Coefficient</b> | <b>Std. Error</b> | <b>t</b> | <b>p</b> |
|---|--------------------|-------------------|----------|----------|
| k | −18.960            | 0.412             | −45.995  | <0.0001  |
| a | −37.407            | 0.389             | −96.244  | <0.0001  |

**Confidence Intervals:**

|   | <b>Coefficient</b> | <b>95% Conf-L</b> | <b>95% Conf-U</b> |
|---|--------------------|-------------------|-------------------|
| k | −18.960            | −19.844           | −18.076           |
| a | −37.407            | −38.241           | −36.573           |

**Analysis of Variance:**

| <b>DF</b>   | <b>SS</b>  | <b>MS</b> |
|-------------|------------|-----------|
| Regression2 | 13,224.176 | 6612.088  |
| Residual14  | 18.774     | 1.341     |
| Total 16    | 13,242.951 | 827.684   |

Corrected for the mean of the observations:

|            | <b>DF</b> | <b>SS</b> | <b>MS</b> | <b>F</b> | <b>p</b> |
|------------|-----------|-----------|-----------|----------|----------|
| Regression | 1         | 2836.974  | 2836.974  | 2115.513 | <0.0001  |
| Residual   | 14        | 18.774    | 1.341     |          |          |
| Total      | 15        | 2855.748  | 190.383   |          |          |

**Statistical Tests:**

**Normality Test (Shapiro-Wilk)** Passed ( $p = 0.0771$ )

W Statistic = 0.8989 Significance Level = 0.0500

**Constant Variance Test** Passed ( $p = 0.2567$ )

**95% Confidence:**

| <b>Row</b> | <b>Predicted</b> | <b>95% Conf-L</b> | <b>95% Conf-U</b> |
|------------|------------------|-------------------|-------------------|
| 1          | −37.407          | −38.241           | −36.573           |
| 2          | −35.878          | −36.666           | −35.090           |
| 3          | −34.041          | −34.779           | −33.303           |
| 4          | −31.093          | −31.767           | −30.419           |
| 5          | −30.223          | −30.882           | −29.564           |
| 6          | −15.242          | −16.026           | −14.459           |
| 7          | −0.980           | −2.281            | 0.320             |
| 9          | −37.407          | −38.241           | −36.573           |
| 10         | −32.343          | −33.042           | −31.645           |

|    |         |         |         |
|----|---------|---------|---------|
| 11 | −30.753 | −31.421 | −30.085 |
| 12 | −26.434 | −27.056 | −25.811 |
| 13 | −23.869 | −24.494 | −23.243 |
| 16 | −37.407 | −38.241 | −36.573 |
| 17 | −28.031 | −28.663 | −27.399 |
| 18 | −17.410 | −18.136 | −16.684 |
| 19 | 10.848  | 9.044   | 12.652  |

**Fit Equation Description:**

[Variables]

x = col(1)

DepVar0 = col(2)

[Parameters]

k = 1 ' {{previous: −18.9603}}

a = 1 ' {{previous: −37.4069}}

[Equation]

 $f = a + ((k) \times \ln(x))$ 

fit f to DepVar0

[Constraints]

[Options]

tolerance = 1e-010

stepsize = 1

iterations = 200

Number of Iterations Performed = 8

Fit of d13C Data of TCE in PCE Experiment

 $f = a - ((k) \times (x \times \ln(x)) / (1 - x))$ 

| <b>R</b> | <b>Rsqr</b>        | <b>Adj Rsqr</b>   | <b>Standard Error of Estimate</b> |          |
|----------|--------------------|-------------------|-----------------------------------|----------|
| 0.983    | 0.966              | 0.963             | 1.396                             |          |
|          | <b>Coefficient</b> | <b>Std. Error</b> | <b>t</b>                          | <b>p</b> |
| k        | −21.138            | 1.029             | −20.546                           | <0.0001  |
| a        | −35.072            | 0.659             | −53.180                           | <0.0001  |

**Confidence Intervals:**

|   | <b>Coefficient</b> | <b>95% Conf-L</b> | <b>95% Conf-U</b> |
|---|--------------------|-------------------|-------------------|
| k | −21.138            | −23.331           | −18.945           |
| a | −35.072            | −36.478           | −33.667           |

**Analysis of Variance:**

|            | <b>DF</b> | <b>SS</b> | <b>MS</b> |
|------------|-----------|-----------|-----------|
| Regression | 2         | 37899.491 | 18949.746 |
| Residual   | 15        | 29.221    | 1.948     |
| Total      | 17        | 37928.712 | 2231.101  |

Corrected for the mean of the observations:

|            | <b>DF</b> | <b>SS</b> | <b>MS</b> | <b>F</b> | <b>p</b> |
|------------|-----------|-----------|-----------|----------|----------|
| Regression | 1         | 822.353   | 822.353   | 422.140  | <0.0001  |
| Residual   | 15        | 29.221    | 1.948     |          |          |
| Total      | 16        | 851.574   | 53.223    |          |          |

**Statistical Tests:**

**Normality Test (Shapiro-Wilk)** Passed ( $p = 0.1999$ )

W Statistic = 0.9278 Significance Level = 0.0500

**Constant Variance Test** Passed ( $p = 0.2930$ )

**95% Confidence:**

| <b>Row</b> | <b>Predicted</b> | <b>95% Conf-L</b> | <b>95% Conf-U</b> |
|------------|------------------|-------------------|-------------------|
| 2          | −55.370          | −56.523           | −54.217           |
| 3          | −54.390          | −55.465           | −53.314           |
| 4          | −52.886          | −53.851           | −51.920           |
| 5          | −52.458          | −53.395           | −51.522           |
| 6          | −46.209          | −46.933           | −45.486           |
| 7          | −42.039          | −42.908           | −41.171           |
| 8          | −36.341          | −37.636           | −35.047           |
| 10         | −53.513          | −54.523           | −52.504           |
| 11         | −52.718          | −53.672           | −51.764           |
| 12         | −50.680          | −51.512           | −49.849           |
| 13         | −49.555          | −50.334           | −48.775           |
| 14         | −37.303          | −38.516           | −36.090           |
| 15         | −36.029          | −37.350           | −34.707           |
| 17         | −51.413          | −52.285           | −50.542           |

|    |         |         |         |
|----|---------|---------|---------|
| 18 | −46.988 | −47.710 | −46.266 |
| 19 | −39.653 | −40.681 | −38.626 |
| 20 | −36.375 | −37.667 | −35.084 |

**Fit Equation Description:**

[Variables]

 $x = \text{col}(1)$  $\text{DepVar0} = \text{col}(3)$ 

[Parameters]

 $k = 1 \text{ ' } \{\{\text{previous: } -21.1382\}\}$  $a = 1 \text{ ' } \{\{\text{previous: } -35.0724\}\}$ 

[Equation]

 $f = a - ((k) \times (x \times \ln(x)) / (1 - x))$ 

fit f to DepVar0

[Constraints]

[Options]

tolerance = 1e-010

stepsize = 1

iterations = 200

Number of Iterations Performed = 8

Fit of d13C Data of TCE in TCE Experiment

 $f = a + ((k) \times \ln(x))$ 

| <b>R</b> | <b>Rsqr</b>        | <b>Adj Rsqr</b>   | <b>Standard Error of Estimate</b> |          |
|----------|--------------------|-------------------|-----------------------------------|----------|
| 0.993    | 0.986              | 0.985             | 0.970                             |          |
|          | <b>Coefficient</b> | <b>Std. Error</b> | <b>t</b>                          | <b>p</b> |
| k        | −12.208            | 0.456             | −26.768                           | <0.0001  |
| a        | −26.742            | 0.424             | −63.043                           | <0.0001  |

**Confidence Intervals:**

|   | <b>Coefficient</b> | <b>95% Conf-L</b> | <b>95% Conf-U</b> |
|---|--------------------|-------------------|-------------------|
| k | −12.208            | −13.225           | −11.192           |
| a | −26.742            | −27.687           | −25.797           |

**Analysis of Variance:**

|            | <b>DF</b> | <b>SS</b> | <b>MS</b> |
|------------|-----------|-----------|-----------|
| Regression | 2         | 4654.374  | 2327.187  |
| Residual   | 10        | 9.407     | 0.941     |
| Total      | 12        | 4663.781  | 388.648   |

Corrected for the mean of the observations:

|            | <b>DF</b> | <b>SS</b> | <b>MS</b> | <b>F</b> | <b>p</b> |
|------------|-----------|-----------|-----------|----------|----------|
| Regression | 1         | 674.050   | 674.050   | 716.522  | <0.0001  |
| Residual   | 10        | 9.407     | 0.941     |          |          |
| Total      | 11        | 683.457   | 62.132    |          |          |

**Statistical Tests:**

**Normality Test (Shapiro-Wilk)** Passed ( $p = 0.1693$ )

W Statistic = 0.9022 Significance Level = 0.0500

**Constant Variance Test** Failed ( $p = 0.0186$ )

**95% Confidence:**

| <b>Row</b> | <b>Predicted</b> | <b>95% Conf-L</b> | <b>95% Conf-U</b> |
|------------|------------------|-------------------|-------------------|
| 1          | −26.742          | −27.687           | −25.797           |
| 2          | −22.433          | −23.149           | −21.717           |
| 3          | −21.244          | −21.917           | −20.571           |
| 4          | −18.926          | −19.553           | −18.300           |
| 5          | −15.054          | −15.731           | −14.377           |
| 7          | −26.742          | −27.687           | −25.797           |
| 8          | −19.850          | −20.489           | −19.212           |
| 9          | −17.424          | −18.051           | −16.797           |
| 10         | −14.747          | −15.435           | −14.060           |
| 11         | −7.244           | −8.350            | −6.138            |
| 13         | −26.742          | −27.687           | −25.797           |
| 14         | −1.400           | −2.932            | 0.132             |

**Fit Equation Description:**

[Variables]

x = col(1)

DepVar0 = col(2)

[Parameters]

$k = 1 \cdot \{\{\text{previous: } -12.2085\}\}$

$a = 1 \cdot \{\{\text{previous: } -26.7423\}\}$

[Equation]

$f = a + ((k) \times \ln(x))$

fit f to DepVar0

[Constraints]

[Options]

tolerance = 1e-010

stepsize = 1

iterations = 200

Number of Iterations Performed = 8

Fit of d13C Data of cis-DCE in TCE Experiment

$f = a - ((k) \times (x \times \ln(x)) / (1 - x))$

**R      Rsqr      Adj Rsqr      Standard Error of Estimate**

0.994    0.989      0.988      0.333

**Coefficient    Std. Error    t            p**

k        -10.018      0.337      -29.689      <0.0001

a        -25.570      0.190      -134.575      <0.0001

**Confidence Intervals:**

**Coefficient    95% Conf-L      95% Conf-U**

k        -10.018      -10.769      -9.266

a        -25.570      -25.993      -25.146

**Analysis of Variance:**

|            | <b>DF</b> | <b>SS</b> | <b>MS</b> |
|------------|-----------|-----------|-----------|
| Regression | 2         | 11211.965 | 5605.982  |
| Residual   | 10        | 1.112     | 0.111     |
| Total      | 12        | 11213.077 | 934.423   |

Corrected for the mean of the observations:

|            | <b>DF</b> | <b>SS</b> | <b>MS</b> | <b>F</b> | <b>p</b> |
|------------|-----------|-----------|-----------|----------|----------|
| Regression | 1         | 98.016    | 98.016    | 881.418  | <0.0001  |
| Residual   | 10        | 1.112     | 0.111     |          |          |
| Total      | 11        | 99.128    | 9.012     |          |          |

#### Statistical Tests:

**Normality Test (Shapiro-Wilk)** Passed ( $p = 0.6535$ )

W Statistic = 0.9511 Significance Level = 0.0500

**Constant Variance Test** Passed ( $p = 0.4981$ )

#### 95% Confidence:

| <b>Row</b> | <b>Predicted</b> | <b>95% Conf-L</b> | <b>95% Conf-U</b> |
|------------|------------------|-------------------|-------------------|
| 2          | −33.923          | −34.262           | −33.584           |
| 3          | −33.500          | −33.815           | −33.186           |
| 4          | −32.720          | −32.995           | −32.446           |
| 5          | −31.545          | −31.776           | −31.315           |
| 6          | −25.842          | −26.248           | −25.436           |
| 8          | −33.024          | −33.314           | −32.735           |
| 9          | −32.246          | −32.500           | −31.992           |
| 10         | −31.459          | −31.687           | −31.231           |
| 11         | −29.632          | −29.854           | −29.409           |
| 12         | −25.776          | −26.186           | −25.366           |
| 14         | −28.553          | −28.809           | −28.296           |
| 15         | −26.975          | −27.311           | −26.638           |

#### Fit Equation Description:

[Variables]

$x = \text{col}(1)$

$\text{DepVar0} = \text{col}(3)$

[Parameters]

$k = 1 \text{ ' } \{ \{ \text{previous: } -10.0176 \} \}$

$a = 1 \text{ ' } \{ \{ \text{previous: } -25.5696 \} \}$

[Equation]

$f = a - ((k) \times (x \times \ln(x)) / (1 - x))$

fit f to DepVar0



[Constraints]

[Options]

tolerance = 1e-010

stepsize = 1

iterations = 200

Number of Iterations Performed = 8

*A7.2. Regressions of Figure 3*

Fit of d37Cl PCE Data in PCE Experiment

$$f = a + ((k) \times \ln(x))$$

| <b>R</b> | <b>Rsqr</b> | <b>Adj Rsqr</b> | <b>Standard Error of Estimate</b> |
|----------|-------------|-----------------|-----------------------------------|
| 0.996    | 0.992       | 0.991           | 0.346                             |

|   | <b>Coefficient</b> | <b>Std. Error</b> | <b>t</b> | <b>p</b> |
|---|--------------------|-------------------|----------|----------|
| k | −5.039             | 0.123             | −40.855  | <0.0001  |
| a | −2.788             | 0.116             | −23.977  | <0.0001  |

**Confidence Intervals:**

|   | <b>Coefficient</b> | <b>95% Conf-L</b> | <b>95% Conf-U</b> |
|---|--------------------|-------------------|-------------------|
| k | −5.039             | −5.303            | −4.774            |
| a | −2.788             | −3.037            | −2.539            |

**Analysis of Variance:**

|            | <b>DF</b> | <b>SS</b> | <b>MS</b> |
|------------|-----------|-----------|-----------|
| Regression | 2         | 202.674   | 101.337   |
| Residual   | 14        | 1.680     | 0.120     |
| Total      | 16        | 204.354   | 12.772    |

Corrected for the mean of the observations:

|            | <b>DF</b> | <b>SS</b> | <b>MS</b> | <b>F</b> | <b>p</b> |
|------------|-----------|-----------|-----------|----------|----------|
| Regression | 1         | 200.344   | 200.344   | 1669.133 | <0.0001  |
| Residual   | 14        | 1.680     | 0.120     |          |          |
| Total      | 15        | 202.024   | 13.468    |          |          |

**Statistical Tests:**

**Normality Test (Shapiro-Wilk)** Passed ( $p = 0.9985$ )

W Statistic = 0.9889 Significance Level = 0.0500

**Constant Variance Test** Passed ( $p = 0.8824$ )

**95% Confidence:**

| Row | Predicted | 95% Conf-L | 95% Conf-U |
|-----|-----------|------------|------------|
| 1   | -2.788    | -3.037     | -2.539     |
| 2   | -2.382    | -2.617     | -2.146     |
| 3   | -1.893    | -2.114     | -1.673     |
| 4   | -1.110    | -1.312     | -0.908     |
| 5   | -0.879    | -1.076     | -0.682     |
| 6   | 3.102     | 2.868      | 3.336      |
| 7   | 6.892     | 6.503      | 7.281      |
| 9   | -2.788    | -3.037     | -2.539     |
| 10  | -1.442    | -1.651     | -1.233     |
| 11  | -1.020    | -1.220     | -0.820     |
| 12  | 0.128     | -0.058     | 0.314      |
| 13  | 0.810     | 0.622      | 0.997      |
| 16  | -2.788    | -3.037     | -2.539     |
| 17  | -0.297    | -0.486     | -0.107     |
| 18  | 2.526     | 2.309      | 2.743      |
| 19  | 10.035    | 9.496      | 10.575     |

**Fit Equation Description:**

[Variables]

$x = \text{col}(1)$

$\text{DepVar0} = \text{col}(2)$

[Parameters]

$k = 1 \text{ ' } \{ \{ \text{previous: } -5.03855 \} \}$

$a = 1 \text{ ' } \{ \{ \text{previous: } -2.78801 \} \}$

[Equation]

$f = a + ((k) \times \ln(x))$

fit f to DepVar0

[Constraints]

[Options]

tolerance = 1e-010

stepsize = 1

iterations = 200

Number of Iterations Performed = 7

Fit of d37Cl TCE Data in PCE Experiment

$$f = a - ((k) \times (x \times \ln(x)) / (1 - x))$$

| <b>R</b> | <b>Rsqr</b> | <b>Adj Rsqr</b> | <b>Standard Error of Estimate</b> |
|----------|-------------|-----------------|-----------------------------------|
| 0.983    | 0.967       | 0.964           | 0.350                             |

|   | <b>Coefficient</b> | <b>Std. Error</b> | <b>t</b> | <b>p</b> |
|---|--------------------|-------------------|----------|----------|
| k | −5.362             | 0.258             | −20.806  | <0.0001  |
| a | 1.811              | 0.165             | 10.962   | <0.0001  |

#### Confidence Intervals:

|   | <b>Coefficient</b> | <b>95% Conf-L</b> | <b>95% Conf-U</b> |
|---|--------------------|-------------------|-------------------|
| k | −5.362             | −5.911            | −4.813            |
| a | 1.811              | 1.459             | 2.163             |

#### Analysis of Variance:

|            | <b>DF</b> | <b>SS</b> | <b>MS</b> |
|------------|-----------|-----------|-----------|
| Regression | 2         | 74.968    | 37.484    |
| Residual   | 15        | 1.834     | 0.122     |
| Total      | 17        | 76.801    | 4.518     |

Corrected for the mean of the observations:

|            | <b>DF</b> | <b>SS</b> | <b>MS</b> | <b>F</b> | <b>p</b> |
|------------|-----------|-----------|-----------|----------|----------|
| Regression | 1         | 52.916    | 52.916    | 432.885  | <0.0001  |
| Residual   | 15        | 1.834     | 0.122     |          |          |
| Total      | 16        | 54.750    | 3.422     |          |          |

#### Statistical Tests:

**Normality Test (Shapiro-Wilk)** Passed ( $p = 0.2820$ )

W Statistic = 0.9368 Significance Level = 0.0500

**Constant Variance Test** Passed ( $p = 0.1998$ )

**95% Confidence:**

| Row | Predicted | 95% Conf-L | 95% Conf-U |
|-----|-----------|------------|------------|
| 2   | −3.338    | −3.627     | −3.049     |
| 3   | −3.089    | −3.359     | −2.820     |
| 4   | −2.708    | −2.950     | −2.466     |
| 5   | −2.599    | −2.834     | −2.365     |
| 6   | −1.014    | −1.195     | −0.833     |
| 7   | 0.044     | −0.174     | 0.261      |
| 8   | 1.489     | 1.165      | 1.813      |
| 10  | −2.867    | −3.120     | −2.614     |
| 11  | −2.665    | −2.904     | −2.426     |
| 12  | −2.148    | −2.357     | −1.940     |
| 13  | −1.863    | −2.058     | −1.667     |
| 14  | 1.245     | 0.941      | 1.549      |
| 15  | 1.568     | 1.237      | 1.899      |
| 17  | −2.334    | −2.553     | −2.116     |
| 18  | −1.212    | −1.392     | −1.031     |
| 19  | 0.649     | 0.392      | 0.906      |
| 20  | 1.480     | 1.157      | 1.804      |

**Fit Equation Description:**

[Variables]

x = col(1)

DepVar0 = col(4)

[Parameters]

k = 1 ' {{previous: −5.36208}}

a = 1 ' {{previous: 1.81095}}

[Equation]

f = a − ((k) × (x × ln(x))/(1 − x))

fit f to DepVar0

[Constraints]

[Options]

tolerance = 1e-010

stepsize = 1

iterations = 200

Number of Iterations Performed = 8

Fit of d37Cl Chloride Data in PCE Experiment

$$f = a - ((k) \times (x \times \ln(x)) / (1 - x))$$

**R      Rsqr      Adj Rsqr      Standard Error of Estimate**

0.541    0.293    0.057    1.451

|   | <b>Coefficient</b> | <b>Std. Error</b> | <b>t</b> | <b>p</b> |
|---|--------------------|-------------------|----------|----------|
| k | −4.106             | 3.687             | −1.114   | 0.3466   |
| a | −14.512            | 1.439             | −10.083  | 0.0021   |

**Confidence Intervals:**

|   | <b>Coefficient</b> | <b>95% Conf-L</b> | <b>95% Conf-U</b> |
|---|--------------------|-------------------|-------------------|
| k | −4.106             | −15.839           | 7.626             |
| a | −14.512            | −19.092           | −9.931            |

**Analysis of Variance:**

|            | <b>DF</b> | <b>SS</b> | <b>MS</b> |
|------------|-----------|-----------|-----------|
| Regression | 2         | 1273.465  | 636.733   |
| Residual   | 3         | 6.315     | 2.105     |
| Total      | 5         | 1279.781  | 255.956   |

Corrected for the mean of the observations:

|            | <b>DF</b> | <b>SS</b> | <b>MS</b> | <b>F</b> | <b>p</b> |
|------------|-----------|-----------|-----------|----------|----------|
| Regression | 1         | 2.612     | 2.612     | 1.241    | 0.3466   |
| Residual   | 3         | 6.315     | 2.105     |          |          |
| Total      | 4         | 8.927     | 2.232     |          |          |

**Statistical Tests:**

**Normality Test (Shapiro-Wilk)**      Passed      ( $p = 0.9202$ )

W Statistic = 0.9774    Significance Level = 0.0500

**Constant Variance Test**      Passed      ( $p = 0.0500$ )

**95% Confidence:**

| <b>Row</b> | <b>Predicted</b> | <b>95% Conf-L</b> | <b>95% Conf-U</b> |
|------------|------------------|-------------------|-------------------|
| 6          | −16.675          | −19.615           | −13.735           |
| 7          | −15.865          | −17.942           | −13.788           |
| 14         | −14.945          | −18.465           | −11.425           |

|    |         |         |         |
|----|---------|---------|---------|
| 18 | −16.826 | −20.088 | −13.565 |
| 19 | −15.402 | −17.981 | −12.822 |

**Fit Equation Description:**

[Variables]

x = col(1)

DepVar0 = col(6)

[Parameters]

k = 1 ' {{previous: −4.10628}}

a = 1 ' {{previous: −14.5118}}

[Equation]

 $f = a - ((k) \times (x \times \ln(x)) / (1 - x))$ 

fit f to DepVar0

[Constraints]

[Options]

tolerance = 1e-010

stepsize = 1

iterations = 200

Number of Iterations Performed = 8

*A7.3. Regressions of Figure 6*

Fit of d37Cl TCE Data of TCE Experiment

 $f = a + ((k) \times \ln(x))$ 

| <b>R</b> | <b>Rsqr</b>        | <b>Adj Rsqr</b>   | <b>Standard Error of Estimate</b> |          |
|----------|--------------------|-------------------|-----------------------------------|----------|
| 0.996    | 0.991              | 0.990             | 0.229                             |          |
|          | <b>Coefficient</b> | <b>Std. Error</b> | <b>t</b>                          | <b>p</b> |
| k        | −3.644             | 0.108             | −33.864                           | <0.0001  |
| a        | 1.244              | 0.100             | 12.427                            | <0.0001  |

**Confidence Intervals:**

|   | <b>Coefficient</b> | <b>95% Conf-L</b> | <b>95% Conf-U</b> |
|---|--------------------|-------------------|-------------------|
| k | −3.644             | −3.883            | −3.404            |
| a | 1.244              | 1.021             | 1.467             |

**Analysis of Variance:**

|            | <b>DF</b> | <b>SS</b> | <b>MS</b> |
|------------|-----------|-----------|-----------|
| Regression | 2         | 232.350   | 116.175   |
| Residual   | 10        | 0.524     | 0.052     |
| Total      | 12        | 232.873   | 19.406    |

Corrected for the mean of the observations:

|            | <b>DF</b> | <b>SS</b> | <b>MS</b> | <b>F</b> | <b><i>p</i></b> |
|------------|-----------|-----------|-----------|----------|-----------------|
| Regression | 1         | 60.040    | 60.040    | 1146.768 | <0.0001         |
| Residual   | 10        | 0.524     | 0.052     |          |                 |
| Total      | 11        | 60.563    | 5.506     |          |                 |

**Statistical Tests:**

**Normality Test (Shapiro-Wilk)** Passed ( $p = 0.8302$ )

W Statistic = 0.9633 Significance Level = 0.0500

**Constant Variance Test** Passed ( $p = 0.0795$ )

**95% Confidence:**

| <b>Row</b> | <b>Predicted</b> | <b>95% Conf-L</b> | <b>95% Conf-U</b> |
|------------|------------------|-------------------|-------------------|
| 1          | 1.244            | 1.021             | 1.467             |
| 2          | 2.530            | 2.361             | 2.699             |
| 3          | 2.884            | 2.726             | 3.043             |
| 4          | 3.576            | 3.428             | 3.724             |
| 5          | 4.732            | 4.572             | 4.892             |
| 7          | 1.244            | 1.021             | 1.467             |
| 8          | 3.301            | 3.150             | 3.451             |
| 9          | 4.025            | 3.877             | 4.173             |
| 10         | 4.824            | 4.661             | 4.986             |
| 11         | 7.063            | 6.802             | 7.324             |
| 13         | 1.244            | 1.021             | 1.467             |
| 14         | 8.807            | 8.446             | 9.169             |

**Fit Equation Description:**

[Variables]

x = col(1)

DepVar0 = col(2)

[Parameters]

k = 1 ' {{previous: -3.64364}}

a = 1 ' {{previous: 1.24361}}

[Equation]

 $f = a + ((k) \times \ln(x))$ 

fit f to DepVar0

[Constraints]

[Options]

tolerance = 1e-010

stepsize = 1

iterations = 200

Number of Iterations Performed = 8

Fit of d37Cl *cis*-DCE Data of TCE Experiment $f = a - ((k) \times (x \times \ln(x)) / (1 - x))$ 

| R | Rsqr | Adj Rsqr | Standard Error of Estimate |
|---|------|----------|----------------------------|
|---|------|----------|----------------------------|

|       |       |       |       |
|-------|-------|-------|-------|
| 0.988 | 0.977 | 0.975 | 0.116 |
|-------|-------|-------|-------|

|   | Coefficient | Std. Error | t       | p       |
|---|-------------|------------|---------|---------|
| k | -2.429      | 0.118      | -20.610 | <0.0001 |
| a | 2.939       | 0.066      | 44.289  | <0.0001 |

**Confidence Intervals:**

|   | Coefficient | 95% Conf-L | 95% Conf-U |
|---|-------------|------------|------------|
| k | -2.429      | -2.691     | -2.166     |
| a | 2.939       | 2.791      | 3.087      |

**Analysis of Variance:**

|            | DF | SS     | MS     |
|------------|----|--------|--------|
| Regression | 2  | 42.921 | 21.461 |
| Residual   | 10 | 0.136  | 0.014  |
| Total      | 12 | 43.057 | 3.588  |



Corrected for the mean of the observations:

|            | <b>DF</b> | <b>SS</b> | <b>MS</b> | <b>F</b> | <b>p</b> |
|------------|-----------|-----------|-----------|----------|----------|
| Regression | 1         | 5.761     | 5.761     | 424.792  | <0.0001  |
| Residual   | 10        | 0.136     | 0.014     |          |          |
| Total      | 11        | 5.897     | 0.536     |          |          |

### Statistical Tests:

**Normality Test (Shapiro-Wilk)** Passed ( $p = 0.1070$ )

W Statistic = 0.8867 Significance Level = 0.0500

**Constant Variance Test** Passed ( $p = 0.1889$ )

### 95% Confidence:

| <b>Row</b> | <b>Predicted</b> | <b>95% Conf-L</b> | <b>95% Conf-U</b> |
|------------|------------------|-------------------|-------------------|
| 2          | 0.914            | 0.795             | 1.032             |
| 3          | 1.016            | 0.906             | 1.126             |
| 4          | 1.205            | 1.109             | 1.301             |
| 5          | 1.490            | 1.410             | 1.570             |
| 6          | 2.873            | 2.731             | 3.014             |
| 8          | 1.131            | 1.030             | 1.233             |
| 9          | 1.320            | 1.232             | 1.409             |
| 10         | 1.511            | 1.431             | 1.591             |
| 11         | 1.954            | 1.876             | 2.032             |
| 12         | 2.889            | 2.746             | 3.032             |
| 14         | 2.216            | 2.126             | 2.305             |
| 15         | 2.598            | 2.481             | 2.716             |

### Fit Equation Description:

[Variables]

x = col(1)

DepVar0 = col(4)

[Parameters]

k = 1 ' {{previous: -2.4287}} }

a = 1 ' {{previous: 2.93881}} }

[Equation]

$f = a - ((k) \times (x \times \ln(x)) / (1 - x))$

fit f to DepVar0

[Constraints]

[Options]

tolerance = 1e-010

stepsize = 1

iterations = 200

Number of Iterations Performed = 8

Fit of d37Cl Chloride Data of TCE Experiment

$$f = a - ((k) \times (x \times \ln(x)) / (1 - x))$$

| R | Rsqr | Adj Rsqr | Standard Error of Estimate |
|---|------|----------|----------------------------|
|---|------|----------|----------------------------|

|       |       |       |       |
|-------|-------|-------|-------|
| 0.920 | 0.847 | 0.825 | 0.522 |
|-------|-------|-------|-------|

|   | Coefficient | Std. Error | t      | p      |
|---|-------------|------------|--------|--------|
| k | −6.457      | 1.038      | −6.223 | 0.0004 |
| a | −1.216      | 0.673      | −1.808 | 0.1136 |

Confidence Intervals:

|   | Coefficient | 95% Conf-L | 95% Conf-U |
|---|-------------|------------|------------|
| k | −6.457      | −8.910     | −4.003     |
| a | −1.216      | −2.807     | 0.375      |

Analysis of Variance:

|            | DF | SS      | MS      |
|------------|----|---------|---------|
| Regression | 2  | 259.643 | 129.821 |
| Residual   | 7  | 1.904   | 0.272   |
| Total      | 9  | 261.546 | 29.061  |

Corrected for the mean of the observations:

|            | DF | SS     | MS     | F      | p      |
|------------|----|--------|--------|--------|--------|
| Regression | 1  | 10.533 | 10.533 | 38.727 | 0.0004 |
| Residual   | 7  | 1.904  | 0.272  |        |        |
| Total      | 8  | 12.437 | 1.555  |        |        |

Statistical Tests:

|                               |        |              |
|-------------------------------|--------|--------------|
| Normality Test (Shapiro-Wilk) | Passed | (p = 0.5600) |
|-------------------------------|--------|--------------|

W Statistic = 0.9379 Significance Level = 0.0500

**Constant Variance Test** Passed ( $p = 0.2428$ )

**95% Confidence:**

| Row | Predicted | 95% Conf-L | 95% Conf-U |
|-----|-----------|------------|------------|
| 2   | −6.601    | −7.255     | −5.946     |
| 3   | −6.328    | −6.906     | −5.751     |
| 4   | −5.825    | −6.289     | −5.362     |
| 5   | −5.068    | −5.486     | −4.651     |
| 8   | −6.021    | −6.524     | −5.519     |
| 9   | −5.520    | −5.942     | −5.097     |
| 10  | −5.013    | −5.434     | −4.591     |
| 11  | −3.835    | −4.515     | −3.154     |
| 14  | −3.139    | −4.044     | −2.234     |

**Fit Equation Description:**

[Variables]

$x = \text{col}(1)$

$\text{DepVar0} = \text{col}(6)$

[Parameters]

$k = 1 \text{ ' } \{ \{ \text{previous: } -6.45696 \} \}$

$a = 1 \text{ ' } \{ \{ \text{previous: } -1.21636 \} \}$

[Equation]

$f = a - ((k) \times (x \times \ln(x)) / (1 - x))$

fit f to DepVar0

[Constraints]

[Options]

tolerance = 1e-010

stepsize = 1

iterations = 200

Number of Iterations Performed = 9
