# Supplementary material for: Chlorine Isotope Effects from Isotope Ratio Mass Spectrometry Suggest Intramolecular C-Cl Bond Competition in Trichloroethene (TCE) Reductive Dehalogenation
Source: Molecules. 2014 May 20;19(5):6450–73. doi: 10.3390/molecules19056450 (PMC6271514; doi:10.3390/molecules19056450)
Supplement: Supplementary file 1 [file molecules-19-06450-s001.zip › A5 Original Experimental Data.xls]

## Sheet: d37ClPCE
f(PCE)	d(f(PCE))	d37Cl (PCE)	d(d37Cl (PCE))	d37Cl (TCE)	d(d37Cl (TCE))	c37Cl (Cl)		d(d37Cl (Cl))/d(d37Cl (PCE0))	d(d37Cl (Cl))/d(d37Cl (PCE))	d(d37Cl (Cl))/d(d37Cl (TCE))	d(d37Cl (Cl))/df	Error in d37Cl (Cl)
								(=4/(1-f))	(=-4f/(1-f))	(=3)	(=…)
1	0.03	-2.56368	0.229909
0.922543	0.0276763	-2.10791	0.043381	-2.94728	0.526795	-23.2929	-23.1261	51.6413	-47.6413	3	-3887.69	108.281
0.837331	0.0251199	-1.5053	0.171543	-3.16491	0.185262	-23.9617	-22.5518	24.5898	-20.5898	3	-926.893	24.2253
0.716757	0.0215027	-1.15851	0.1	-1.63048	0.292035	-17.8675	-19.5866	14.1221	-10.1221	3	-223.621	5.95443
0.684614	0.0205384	-0.80799	0.1	-2.57123	0.20294	-18.3542	-17.7855	12.6829	-8.68287	3	-198.733	5.12709
0.310678	0.00932035	3.08681	0.136605	-1.37639	0.1	-17.4047	-16.3123	5.80281	-1.80281	3	-60.5312	1.4996
0.146432	0.00439297	7.54636	0.110938	-0.349554	0.1	-17.5233	-16.1437	4.68621	-0.686213	3	-60.6438	1.1522
0.0138256	0.000414768			1.75673	0.726906
1	0.03	-2.66675	0.1
0.765628	0.0229688	-2.05638	0.1	-3.28628	0.22981	-7.32798	-7.02476	17.0669	-13.0669	3	-140.374	5.28913
0.704031	0.0211209	-1.34913	0.1	-2.42415	0.128693	-13.8138	-14.5386	13.5149	-9.51493	3	-164.035	4.76574
0.560597	0.0168179	-0.277403	0.1	-2.79453	0.1	-14.1483	-13.5386	9.10325	-5.10325	3	-89.8331	2.64826
0.489672	0.0146901	0.527637	0.1	-2.19098	0.1	-15.6884	-15.5465	7.83809	-3.83809	3	-77.2548	2.18464
0.0289231	0.000867692			1.14153	0.1	-14.0328	-13.9847	4.11914	-0.119138	3	-11.3546	0.993456
0.00965662	0.000289699			1.93758	0.751655
1	0.03	-2.6236	0.1
0.609883	0.0182965	-0.246356	0.1	-2.98407	0.0480833	-16.6532	-15.7935	10.2533	-6.25333	3	-129.844	3.40775
0.348313	0.0104494	2.25166	0.105303	-2.00474	0.237588	-15.3427	-14.5353	6.13792	-2.13792	3	-59.1755	1.71244
0.0784689	0.00235407	9.89349	0.55046	0.143511	0.1	-15.4102	-14.9282	4.3406	-0.340602	3	-60.6228	1.06837
0.0143072	0.000429217			1.47192	0.183141

## Sheet: d37ClTCE
f(TCE)	d(f(TCE))	d37Cl (TCE)	d(d37Cl (TCE))	d37Cl (cis)	d(d37Cl (cis))	c37Cl (Cl)		d(d37Cl (Cl))/d(d37Cl (TCE0))	d(d37Cl (Cl))/d(d37Cl (TCE))	d(d37Cl (Cl))/d(d37Cl (cDCE))	d(d37Cl (Cl))/df	Error in d37Cl (Cl)
								(=3/(1-f))	(=-3f/(1-f))	(=2)	(=…)
1,0000	0.03	1.3473	0.1
0,7026	0.021078	2,6531	0.1	0,8575	0.1	-6,9274	-6.92782	10.0874	-7.08742	2	-99.3191	2.4377
0,6374	0.019122	3,0254	0.1	1,1418	0.1	-7,0916	-7.09126	8.27358	-5.27358	2	-72.6703	1.71278
0,5272	0.015816	3,5299	0.1	1,1444	0.1	-5,5474	-5.54806	6.34518	-3.34518	2	-42.3731	1.00182
0,3839	0.011517	4,7473	0.1	1,5658	0.1	-5,4451	-5.44544	4.86934	-1.86934	2	-32.3784	0.671643
5,1343e-3			0.1	2,9815	0.1
1,0000	0.03	1,3783
0,5686	0.017058	3,1695	0.1	1,1531	0.1	-5,4705	-5.46944	6.9541	-3.9541	2	-46.0897	1.13932
0,4661	0.013983	3,7896	0.1	1,3870	0.1	-5,1295	-5.12853	5.61903	-2.61903	2	-34.0933	0.807215
0,3744	0.011232	4,4270	0.1	1,4325	0.1	-4,3517	-4.35236	4.7954	-1.7954	2	-27.7686	0.632038
0,2025	0.006075	6,8587	0.1	1,9892	0.1	-4,1343	-4.13482	3.76176	-0.761755	2	-27.3126	0.46351
3,6524e-3			0.1	2,9815	0.1
1,0000	0.03	1,2967
0,1255	0.003765	9,2297	0.1	1,9509	0.1	-3,2521	-3.25351	3.43053	-0.430532	2	-31.4535	0.416609
0,0425				2,5316	0.1

## Sheet: d13CPCE
f(PCE)	d13C(PCE)	stdv	d13C(TCE)	stdv
1	-36.121	0.0424264
0.922543	-34.8675	0.461741	-53.8615	0.526795
0.837331	-33.743	0.0226274	-54.224	0.185262
0.716757	-31.76	0.0240416	-50.5735	0.292035
0.684614	-30.6645	0.157685	-52.1025	0.20294
0.310678	-16.326	0.0721249	-47.2605	0.0544472
0.146432	-0.3475	0.505581	-42.689	0.0452548
0.0138256			-34.687	0.726906
1	-35.8585	0.00353553
0.765628	-34.0455	0.181726	-53.8915	0.22981
0.704031	-31.77	0.101823	-51.843	0.128693
0.560597	-27.747	0.0353553	-52.1165	0.00494975
0.489672	-24.6855	0.10253	-50.576	0.0226274
0.0289231			-35.0345	0.0304056
0.00965662			-37.2675	0.751655
1	-36.0615	0.00353553
0.609883	-27.3135	0.0304056	-52.284	0.0480833
0.348313	-18.477	0.26163	-48.945	0.237588
0.0784689	12.1175	0.286378	-40.858	0.019799
0.0143072			-35.7075	0.183141
	-36.0137

## Sheet: d13CTCE
C/C0	d13C(TCE)	SD	d13C(cDCE)	SD
100	-26.344	0.0254558
70.2587	-22.2485	0.0615183	-33.9765	0.191626
63.7409	-20.5905	0.0502046	-33.3255	0.105359
52.718	-18.544	0.14425	-32.5375	0.120915
38.3883	-14.7105	0.426385	-31.304	0.066468
0.513427	#		-26.017	0.0777817
100	-26.5615	0.194454
56.8634	-20.1865	0.133643	-32.925	0.0707107
46.6138	-18.882	0.223446	-32.954	0.302642
37.4372	-15.829	0.00282843	-31.534	0.0452548
20.248	-8.62	0.654781	-29.6035	0.0997021
0.365241	#		-26.053	0.110309
100	-26.382	0.0268701
12.5455	0.349	1.14127	-28.5905	0.00494975
4.25316	#		-26.3745	0.24678
